# Supplementary material for: The SspB adaptor drives structural changes in the AAA+ ClpXP protease during ssrA-tagged substrate delivery
Source: PubMed Central journal article supplement — Proc Natl Acad Sci U S A. 2023 Feb 2;120(6):e2219044120. doi: 10.1073/pnas.2219044120 (PMC9963277; doi:10.1073/pnas.2219044120), 2023-02-02
Supplement: pnas.2219044120.sapp.pdf [file pnas.2219044120.sapp.pdf]

## Supporting Information for

### **The SspB adaptor drives structural changes in the AAA+ ClpXP protease during *ssrA*-tagged substrate delivery**

Alireza Ghanbarpour, Xue Fei, Tania A. Baker,

Joseph H. Davis, and Robert T. Sauer

Corresponding authors: J.H. Davis; R.T. Sauer  
Email: [jhdavis@mit.edu](mailto:jhdavis@mit.edu); [bobsauer@mit.edu](mailto:bobsauer@mit.edu)

#### **This PDF file includes:**

Figures S1 to S3  
Tables S1  
Legends for Movies S1 and S2  
SI Reference

#### **Other supporting materials for this manuscript include:**

Movies S1 and S2

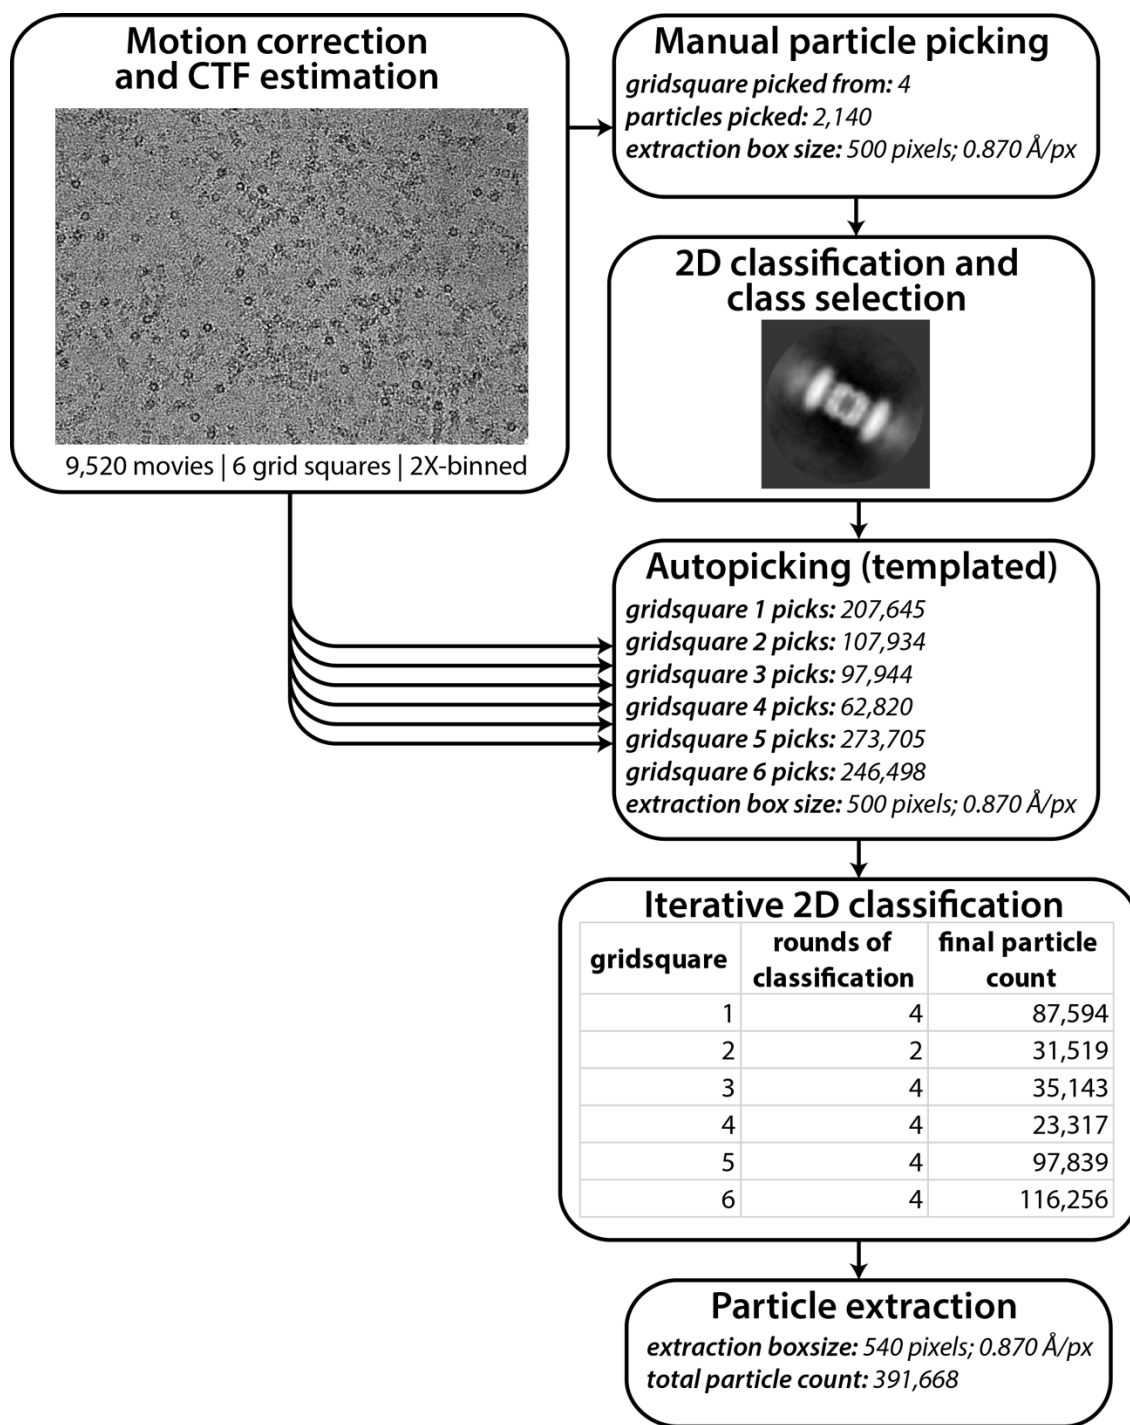

**Fig. S1. Pre-processing workflow.** Initial micrograph and 2D particle processing. Job types and key parameters are noted.

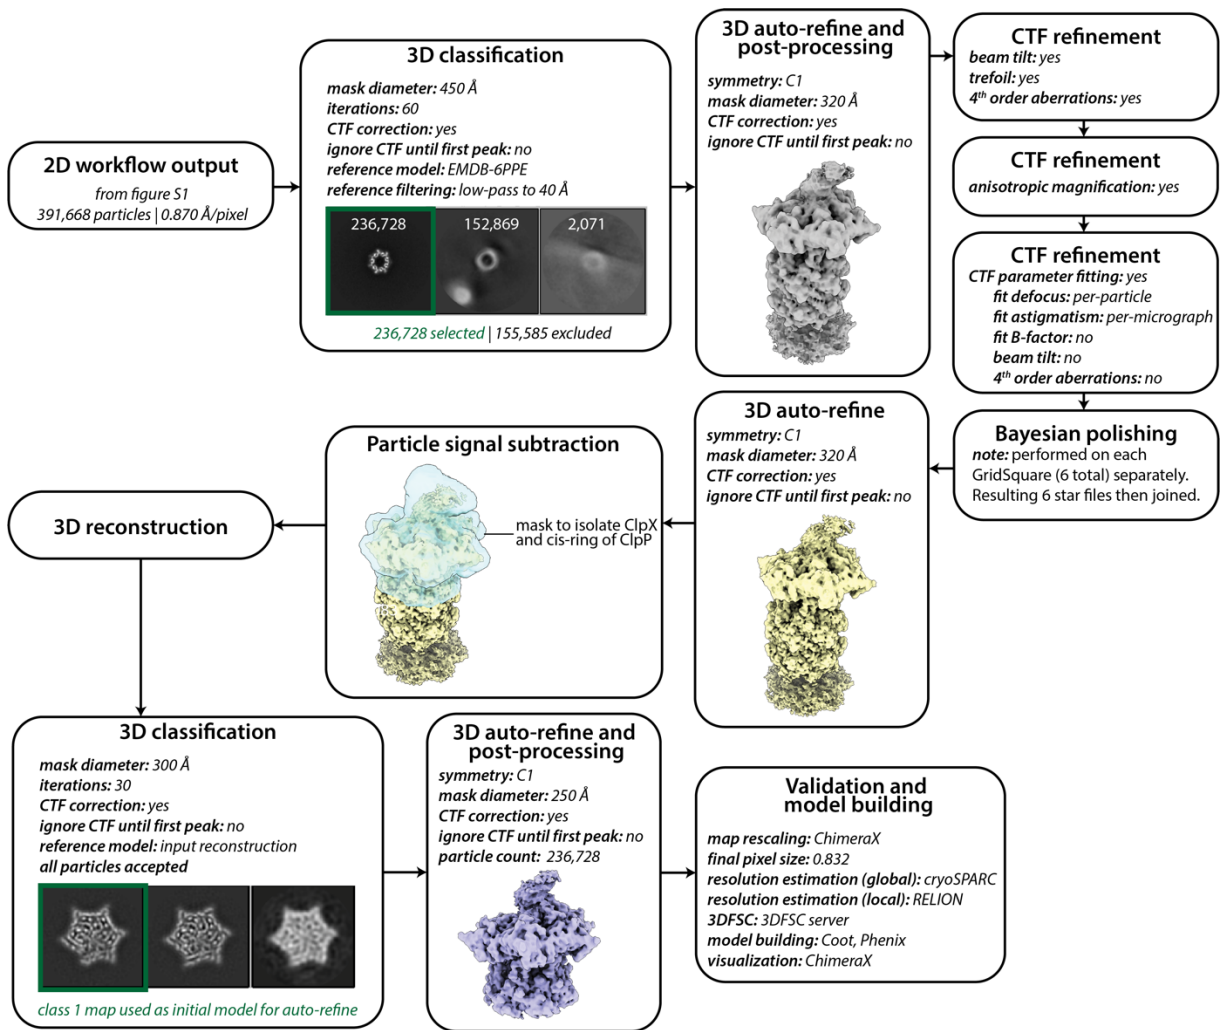

**Fig. S2. RELION 3D processing workflow.** Job names, job details, and non-default parameters are noted in each box.

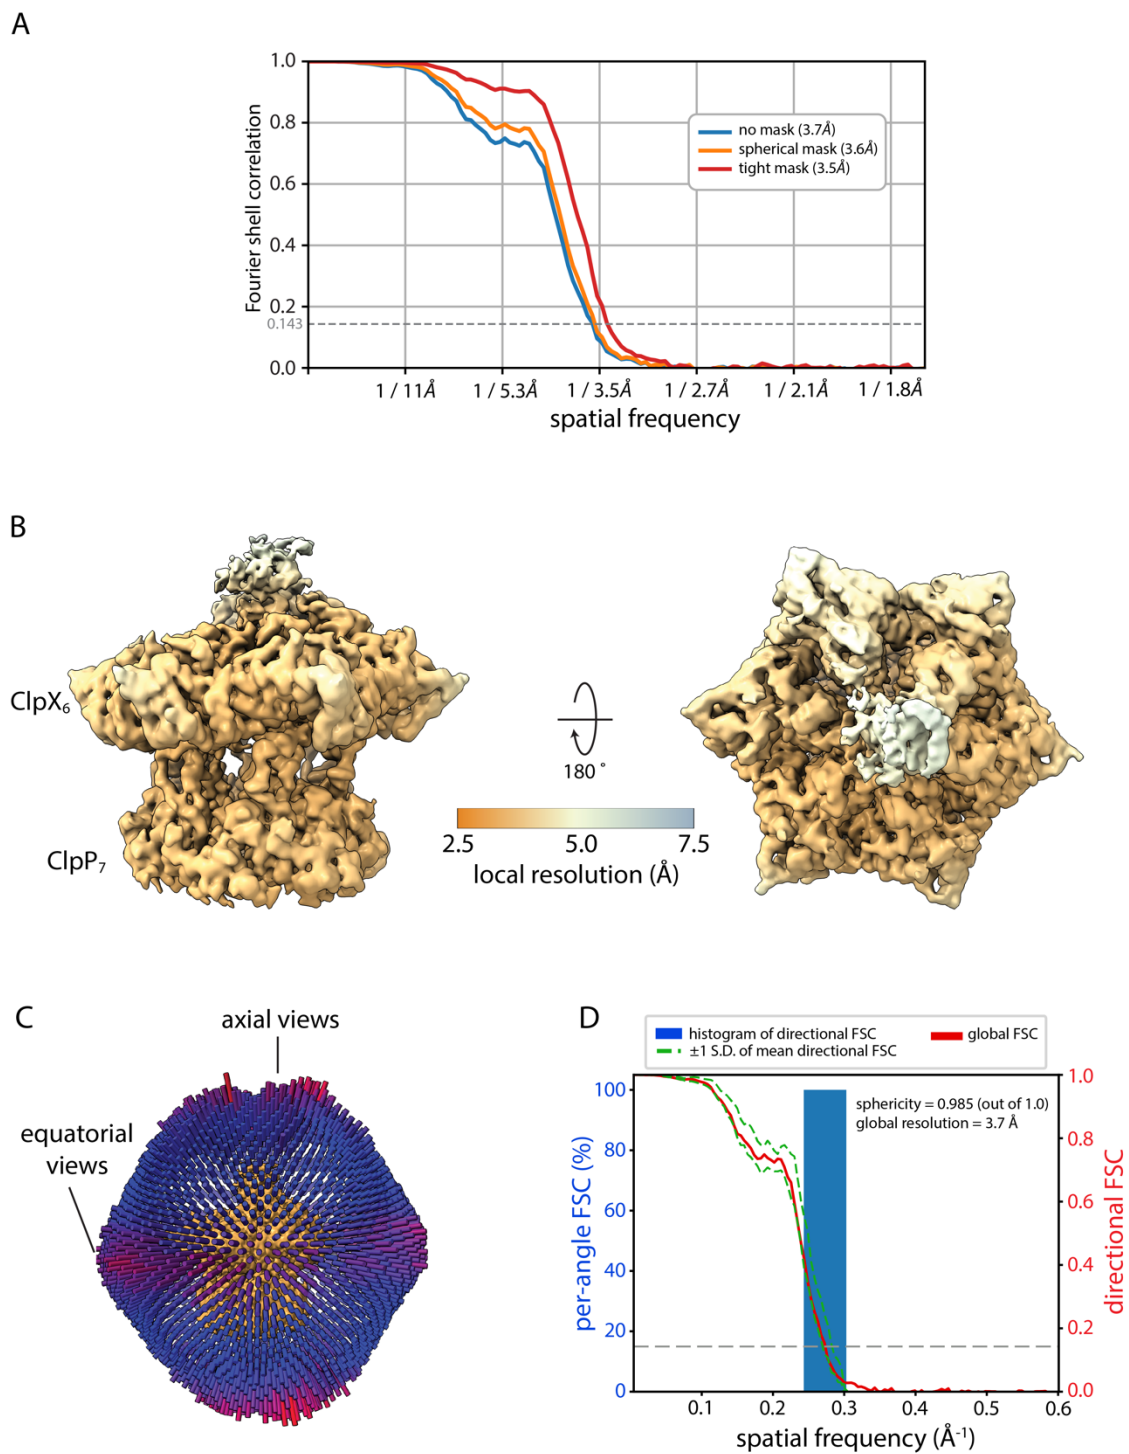

**Fig. S3. Map assessment and validation.** (A) Global resolution estimation by GSFSC implemented in CryoSPARC. (B) Local resolution assessment as estimated by RELION. (C) Projection angle distribution and directional FSC as estimated by the 3DFSC server (1).

**Table S1.** Cryo-EM data collection, refinement, model building, validation, and processing.

|                                               |                         |
|-----------------------------------------------|-------------------------|
| <b>Sample and data deposition information</b> |                         |
| Nucleotide added                              | ATP $\gamma$ S          |
| PDB ID                                        | 8ET3                    |
| EMDB ID                                       | 28585                   |
| EMPIAR ID                                     | 11349                   |
| <b>Data collection</b>                        |                         |
| Microscope                                    | Titan Krios G3i         |
| Camera / mode                                 | Gatan K3 / counting     |
| Magnification (nominal)                       | 105,000 X               |
| Accelerating voltage (kV)                     | 300                     |
| Total electron dose (e-/Å <sup>2</sup> )      | 76                      |
| Defocus range ( $\mu$ m)                      | -1.0 to -2.5            |
| Micrographs collected                         | 9,520                   |
| Pixel size (super resolution)                 |                         |
| initial (Å)                                   | 0.435                   |
| calibrated (Å)                                | 0.416                   |
| <b>Model composition</b>                      |                         |
| Non-hydrogen atoms                            | 53,287                  |
| Protein residues                              | 3,639                   |
| Ligands                                       | 4 ATP $\gamma$ S, 2 ADP |
| <b>Model refinement</b>                       |                         |
| Refinement package                            | Phenix                  |
| Map-to-model cross correlation                | 0.78                    |
| RMS deviation bond lengths (Å)                | 0.002                   |
| RMS deviation bond angles (°)                 | 0.633                   |
| <b>Model validation</b>                       |                         |
| MolProbity score                              | 0.89                    |
| Clash score                                   | 1.51                    |
| C-beta outliers (%)                           | 0                       |
| Rotamer outliers (%)                          | 0                       |
| Ramachandran favored (%)                      | 99.69                   |
| <b>Map reconstruction</b>                     |                         |
| Image processing package                      | RELION 3.1              |
| Extracted particles                           |                         |
| for 2D classification                         | 996,546                 |
| for 3D classification                         | 391,668                 |
| final count                                   | 236,728                 |
| <b>Resolution (Å)</b>                         |                         |
| 0.143 GSFSC unmasked                          | 3.7                     |
| 0.143 GSFSC spherical mask                    | 3.6                     |
| 0.143 GSFSC tight mask                        | 3.5                     |
| 3DFSC sphericity (unmasked)                   | 0.985                   |

**Movie S1.** Morph between the protease•substrate•adaptor complex (PDB 8ET3) and recognition complex (PDB 6WRF) as viewed from subunit **E** of ClpX (orange cartoon representation). As SspB (green surface representation) docks with ClpX (cartoon representation and surface outline) in the protease•substrate•adaptor complex, ClpX subunit **F** (gray cartoon representation) moves up to contact SspB and the IGF loop of ClpX subunit **E** moves from one binding cleft of ClpP to the adjacent, formerly empty, cleft.

**Movie S2.** Morph between the recognition complex (PDB 6WRF) and protease•substrate•adaptor complex (PDB 8ET3) as viewed from subunit **F** of ClpX.

### **SI Reference**

1. Y.Z. Tan *et al.*, Addressing preferred specimen orientation in single-particle cryo-EM through tilting. *Nat. Methods* **14**, 793 (2017).
